# Supplementary material
Source: Research Square preprint supplement (doi:10.21203/rs.3.rs-9258298/v1)
Supplement: Supplementary file 1 [file 6aac46e3866aae4a0ee03fe6.docx]

Chidamide-BEAM Conditioning plus Autologous Stem Cell Transplantation for T-cell Lymphoma: A Single-Arm, Single-Center, Phase 2 Trial

Protocol No. ASCT-001

Investigator’s Brochure

Protocol Version 1.0 – Dated February 1, 2022

Table of Contents

Signature page for principal investigators......................................................................4

Abstract..........................................................................................................................5

1. Clinical trial’s objective.............................................................................................8
   1. Primary endpoint...................................................................................................8
   2. Secondary endpoints.............................................................................................8
2. Study background.......................................................................................................9
3. Patient selection........................................................................................................11
   1. Inclusion criteria.................................................................................................11
   2. Exclusion criteria................................................................................................11
   3. Withdrawal criteria.............................................................................................12
4. Study design.............................................................................................................13
5. Treatment protocol...................................................................................................14
   1. Treatment regimen, dosage, and adjustment.......................................................14
   2. Concomitant medication.....................................................................................14
6. Research calendar.....................................................................................................15
   1. Observation items and time points......................................................................15
   2. Study endpoints...................................................................................................16
7. Efficacy evaluation...................................................................................................17

7.1 Evaluation criteria..............................................................................................17

7.2 Evaluation methods............................................................................................17

1. Adverse events.........................................................................................................18

8.1 Definition............................................................................................................18

8.2 Attribution of the AE..........................................................................................18

8.3 Serious AE..........................................................................................................19

8.4 Reporting process...............................................................................................19

1. Data management and statistical analysis................................................................20

9.1 Evaluation of curative effect..............................................................................20

9.2 Safety evaluation................................................................................................20

9.3 Statistical analysis..............................................................................................21

1. Trial quality control and Data safety monitoring committee.................................22
   1. Trial quality control…......................................................................................22
   2. Data safety monitoring committee....................................................................22
2. Ethical principles....................................................................................................23
   1. Researcher's responsibility................................................................................23
   2. Ethics Committee..............................................................................................23
   3. Practice for Clinical Research Management.....................................................23
   4. Informed consent..............................................................................................23
   5. Confidentiality of subject's personal data.........................................................24
3. Data storage............................................................................................................25
4. Study evidence…...................................................................................................26
5. Responsibilities and publication requirements……………...………….…….......27
6. Expected progress..................................................................................................28

References…………………………………………………………..………………..29

Appendix 1 Evaluation Criteria for Malignant Lymphoma (Lugano Criteria) …...... 30

Appendix 2 NHL efficacy criteria (excluding PET-CT)....……………………...…...32

Appendix 3 NHL efficacy criteria (including PET-CT)……..…….…………………33

**Signature page for principal investigators**

I acknowledge that I have reviewed and approved this document

| **Study Principal Investigator:**  Wei-Li Zhao, PhD, MD | **Signed by: 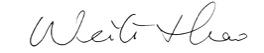** |
| --- | --- |
| **Study Lead Statistician:**  Rong-Ji Mu, PhD, MD | **Signed by: 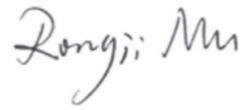** |

**Abstract**

**Clinical trial’s objective** To evaluate the safety and efficacy of Chidamide combined with Carmustine, Etoposide, Cytarabine, and Melphalan regimen (Chi-BEAM) as a conditioning regimen for autologous stem cell transplantation (ASCT) in patients with T-cell lymphoma (TCL) using a single-center, single-arm, prospective clinical study design.

**Study design**

This trial plans to enroll 23 TCL patients and utilize the Chi-BEAM regimen as the preconditioning regimen prior to ASCT. The entire trial includes a screening period, a treatment period (2 weeks before and after transplant infusion), and a follow-up period (2 years after ASCT).

During the follow-up period, the following assessments will be performed at 3, 6, 9, and 18 months post-ASCT: complete blood count, blood biochemistry, B-ultrasound of the liver, gallbladder, pancreas, spleen, and systemic lymph nodes, and systemic contrast-enhanced CT scan. At 1 year and 2 years post-ASCT, assessments including complete blood count, blood biochemistry, and whole-body PET-CT will be conducted until the study concludes.

Chidamide maintenance will be administered post-ASCT (30mg, twice weekly, starting 2 months after ASCT, maintained for at least 2 years).

**Inclusion criteria**

1. According to the world Health Organization (WHO) classification of disease, TCL (except IPI 0-1 ALK+ anaplastic cell lymphoma) was confirmed by histology, complete remission (CR) or partial remission (PR) after first-line treatment

2. 18≤ age ≤65 years old, male or female

3. ECOG score 0-1

4. No serious organic lesions in the main organs, meeting the requirements of the following laboratory examination indicators (conducted within 7 days before treatment)

① White blood cell count ≥3.0×109/L, absolute neutrophil count ≥1.5×109/L, Hemoglobin ≥90g/L, platelet ≥75×109/L

② Total bilirubin ≤1.5× upper normal value (ULN)

③ Aspartate aminotransferase (AST) and alanine aminotransferase (ALT) ≤2.5× upper normal value (ULN)

④ Creatinine clearance was 44-133 mmol/L

5. No cardiac dysfunction

6. Life expectancy over 3 months

7. The subject or his/her legal representative must provide written informed consent before conducting a special study examination or procedure

**Exclusion criteria**

1. Central nervous system lymphoma was excluded

2. Suffering from serious complications or severe infection

3. A history of other malignant tumors within 5 years, excluding early tumors treated for curative purposes

4. Patients with uncontrolled cardiovascular and cerebrovascular diseases, coagulation disorders, connective tissue diseases, serious infectious diseases

5. HBsAg, HCV, or HIV positive. Positive HBV and HCV serology is allowed, but DNA/RNA testing must be negative

6. Laboratory test value during screening

① Neutrophils <1.5×109/L, Platelet <75×109/L

② Bilirubin was 1.5 times higher than the normal upper limit, transaminase was 2.5 times higher than the normal upper limit

③ The creatinine level is higher than 1.5 times the upper limit of normal value

7. Left ventricular ejection fraction ≤50%

8. Other concurrent and uncontrolled medical conditions considered by the investigator would affect the patient's participation in the study

9. Psychiatric patients or other patients known or suspected to be unable to fully comply with the study protocol

10. Pregnant or lactating women

11. The researcher judged that the patients were not suitable for this study

**Withdrawal criteria**

Participants may withdraw from the study at any time due to the following reasons:

1. According to the researcher's judgment, for the best interests of the patients

2. Disease progression or initiation of other anti-lymphoma treatments

3. The study subjects are requested to withdraw at any time for any reason

4. Lost follow-up

5. Death

6. Patients who experience severe toxicity or delay chemotherapy for more than 2 weeks due to adverse events

7. Cardiac toxicity: LVEF ≤50% or a decrease of more than 15% compared to baseline or previous cardiac pool scan

**Sample size** 23 TCL patients

**Statistical analysis**

1. OS was defined as the time from the date of transplantation to the date of death

from any cause. PFS was defined as the time from the date of transplantation to the date of disease progression, relapse, or death from any cause, whichever occurred first. Patients who were lost to follow-up or who had not experienced an event by the end of the study period were censored at the time of their last known follow-up.

1. Survival curves were estimated using the Kaplan-Meier method, and comparisons

between groups were performed with the log-rank test. All statistical analyses were performed using IBM SPSS Statistics, Version 26.0, and a two-sided p-value <0.05 was considered statistically significant.

**Trial’s duration** The study duration was determined to be 3 years, with patients’ accrual occurring within the first 2 years.

1. **Clinical trial’s objective**
   1. **Primary endpoint**

The primary endpoint was 2-year progression-free survival (PFS) rate, defined as the proportion of patients who were alive and free from disease progression at 2 years after randomization.

- 1. **Secondary endpoints**

The secondary endpoint was 2-year overall survival (OS) rate, defined as the proportion of patients who were alive at 2 years after randomization.

The other secondary endpoints included CR rate (the percentage of participants with complete response was determined using the 2014 Lugano criteria), the time of hematopoietic reconstruction, and transplantation-related adverse events (AEs). The first day of neutrophil counts ≥0.5 × 109/L for 3 consecutive days was the time of successful implantation of granulocytes. The first day of platelet counts ≥20.0 × 109/L for 7 consecutive days without platelet infusion was considered the successful megakaryocyte implantation time.

1. **Study background**

TCL is a group of highly heterogeneous malignant clonal diseases with different pathogenesis and clinical prognoses, accounting for about 7% of all non-Hodgkin lymphoma (NHL) cases. Anthracycline-containing therapy, specifically Cyclophosphamide, Doxorubicin, Vincristine, and Prednisone (CHOP), is the standard first-line treatment for TCL, with an objective response (OR) rate of 40-50% and a CR rate of 20-30% [1]. Prospective studies have confirmed that high-dose chemotherapy and ASCT are effective for TCL patients, with 5-year OS and PFS of 53% and 40%, respectively. Although anthracycline-based chemotherapy bridging to ASCT can provide survival benefits for TCL patients, 40%-50% of patients still have poor response to treatment and experience relapse or death in the short term [2].

In recent years, in-depth research into pathophysiology has revealed that histone deacetylases (HDACs) are associated with the pathogenesis, treatment, and poor prognosis of TCL. HDACs interfere with epigenetic modifications by deacetylating histones and non-histone proteins of oncogenic nuclear transcription factors, affecting the proliferation and differentiation of tumor cells, while also regulating cytokines in the tumor microenvironment. A series of HDAC inhibitors with different characteristics have been developed and applied in the treatment of various malignant tumors, many of which show good efficacy against various TCLs, especially HTLV-1-infected TCL, cutaneous TCL, and acute TCL [3].

Chidamide is a subtype-selective HDAC inhibitor of the benzamide class, which selectively inhibits the activity of HDAC 1, 2, 3, and 10 by blocking the catalytic pocket of Class I HDACs [4]. In vitro experiments have demonstrated that Chidamide inhibits the proliferation of NKT cell lymphoma cells in a dose- and time-dependent manner, directly blocks tumor cell cycle progression and induces apoptosis, while also inhibiting phenotypic transformation of tumor cells and the microenvironment [5]. Chidamide inhibits the phosphorylation levels of proteins in the AKT/mTOR and MAPK signaling pathways, activates the DNA damage response pathway, namely the ATM-Chk2-p53-p21 pathway, promotes apoptosis, and induces cell cycle arrest in the G0/G1 phase [6]. In a real-world study of patients with relapsed/refractory TCL, Chidamide combined with chemotherapy showed significant efficacy, with an OR rate of 51.18%, a disease control rate of 74.02%, and a median PFS of 152 days (129 days for Chidamide monotherapy). The safety profile was acceptable, with most AEs being grade 1 to 2, and approximately 5% of patients experiencing grade 3-4 thrombocytopenia (18.1%), neutropenia (12.6%), anemia (7.1%), or fatigue (5.5%) [7].

Besides combination with chemotherapy, the application of Chidamide in ASCT has also shown promising prospects. A multicenter, single-arm, open-label phase II clinical trial (NCT03629873) presented at the 2021 American Society of Hematology Annual Meeting (ASH meeting), investigating Chidamide combined with Carmustine, Etoposide, Cytarabine, and Cyclophosphamide (Chi-BEAC) as a conditioning regimen for ASCT in high-risk and relapsed/refractory lymphoma, yielded impressive results. Compared with the historical control group, Chi-BEAC improved the 2-year PFS after ASCT in TCL patients from 55% to 93.3% and the 2-year OS from 58% to 94%, with good tolerability and an adverse reaction rate of 5%. Most adverse reactions were controllable febrile neutropenia, electrolyte disturbances, and abnormal liver function [8].

This study targets TCL subjects (excluding ALK+ anaplastic large cell lymphoma with IPI 0-1) who achieved CR/PR at the end of first-line treatment. Using a single-center, single-arm, prospective clinical study design, it aims to evaluate the efficacy and safety of the Chi-BEAM conditioning regimen during ASCT in TCL patients, providing a novel approach to improve the post-ASCT survival rate of TCL patients.

1. **Patient selection**
   1. **Inclusion criteria**

1. According to the world Health Organization (WHO) classification of disease, TCL (except IPI 0-1 ALK+ anaplastic cell lymphoma) was confirmed by histology, CR or PR after first-line treatment

2. 18≤ age ≤65 years old, male or female

3. ECOG score 0-1

4. No serious organic lesions in the main organs, meeting the requirements of the following laboratory examination indicators (conducted within 7 days before treatment)

① White blood cell count ≥3.0×109/L, absolute neutrophil count ≥1.5×109/L, Hemoglobin ≥90g/L, platelet ≥75×109/L

② Total bilirubin ≤1.5× upper normal value (ULN)

③ Aspartate aminotransferase (AST) and alanine aminotransferase (ALT) ≤2.5× upper normal value (ULN)

④ Creatinine clearance was 44-133 mmol/L

5. No cardiac dysfunction

6. Life expectancy over 3 months

7. The subject or his/her legal representative must provide written informed consent before conducting a special study examination or procedure

**3.2 Exclusion criteria**

1. Central nervous system lymphoma was excluded

2. Suffering from serious complications or severe infection

3. A history of other malignant tumors within 5 years, excluding early tumors treated for curative purposes

4. Patients with uncontrolled cardiovascular and cerebrovascular diseases, coagulation disorders, connective tissue diseases, serious infectious diseases

5. HBsAg, HCV, or HIV positive. Positive HBV and HCV serology is allowed, but DNA/RNA testing must be negative

6. Laboratory test value during screening

① Neutrophils <1.5×109/L, Platelet <75×109/L

② Bilirubin was 1.5 times higher than the normal upper limit, transaminase was 2.5 times higher than the normal upper limit

③ The creatinine level is higher than 1.5 times the upper limit of normal value

7. Left ventricular ejection fraction ≦ 50%

8. Other concurrent and uncontrolled medical conditions considered by the investigator would affect the patient's participation in the study

9. Psychiatric patients or other patients known or suspected to be unable to fully comply with the study protocol

10. Pregnant or lactating women

11. The researcher judged that the patients were not suitable for this study

**3.3 Withdrawal criteria**

Participants may withdraw from the study at any time due to the following reasons:

1. According to the researcher's judgment, for the best interests of the patients

2. Disease progression or initiation of other anti-lymphoma treatments

3. The study subjects are requested to withdraw at any time for any reason

4. Lost follow-up

5. Death

6. Patients who experience severe toxicity or delay chemotherapy for more than 2 weeks due to adverse events

7. Cardiac toxicity: LVEF ≤50% or a decrease of more than 15% compared to baseline or previous cardiac pool scan

**4. Study design**

This trial plans to enroll 23 TCL patients and utilize the Chi-BEAM regimen as the preconditioning regimen prior to ASCT. The entire trial includes a screening period, a treatment period (2 weeks before and after transplant infusion), and a follow-up period (2 years after ASCT).

During the follow-up period, the following assessments will be performed at 3, 6, 9, and 18 months post-ASCT: complete blood count, blood biochemistry, B-ultrasound of the liver, gallbladder, pancreas, spleen, and systemic lymph nodes, and systemic contrast-enhanced CT scan. At 1 year and 2 years post-ASCT, assessments including complete blood count, blood biochemistry, and whole-body PET-CT will be conducted until the study concludes.

Chidamide maintenance will be administered post-ASCT (30mg, twice weekly, starting 2 months after ASCT, maintained for at least 2 years).

**5. Treatment protocol**

**5.1 Treatment regimen, dosage, and adjustment**

D0 is the day of stem cell transplant infusion

**Chi-BEAM**

| **Drug name** | **Dosage** | **Route** | **Time of administration** |
| --- | --- | --- | --- |
| **Chidamide** | 30mg | Orally | Day-7, -4, -1 and +3 |
| **Carmustine** | 300mg/m2 | ivgtt. | Day-7 |
| **Etoposide** | 100mg/m2 | ivgtt. | Day-6 to -3 |
| **Cytarabine** | 200mg/m2 | ivgtt. | Day-6 to -3 |
| **Melphalan** | 140 mg/m2 | ivgtt. | Day-2 |

Chidamide maintenance will be administered post-ASCT (30mg, twice weekly, starting 2 months after ASCT, maintained for at least 2 years)

When the neutrophil or platelet count is insufficient in the maintenance therapy, reducing the dosage of chemotherapy will be considered by the investigator. The dosage will be adjusted to 20mg, twice weekly.

**5.2 Concomitant medication**

Concomitant therapy given as a result of an adverse event should also be reported if it meets the reporting criteria, which should be provided on the AEs page of the CRF form. If necessary, patients can be given adequate supportive care, including transfusion of whole blood and blood products, antibiotic therapy, and antiemetic therapy. The reason for treatment, dosage, and date of treatment should also be recorded in the CRF form. For patients with large masses, it is up to the investigator to decide whether radiotherapy is needed.

1. **Research calendar**

**6.1 Observation items and time points**

| **Research Procedure** | **Screening Period** | **Treatment Period**  **(Chi-BEAM Conditioning)** | **Follow-up Period** |  |
| --- | --- | --- | --- | --- |
|  |  | **±2 Weeks Around ASCT** | **3, 6, 9, 12, 18, 24**  **Months Post-ASCT** |
| **Research Management Procedures** | | | |
| Enrollment / Informed Consent | √ |  |  |  |
| Medical History Collection | √ |  |  |  |
| Bone Marrow Aspirate + Biopsy | √ |  |  |  |
| Tissue Biopsy & Molecular Marker Testing | √ |  |  |  |
| Physical Examination | √ |  | √ |  |
| ECOG Performance Status | √ | √ | √ |  |
| Blood Routine, Urinalysis, Stool Routine | √ | √ | √ |  |
| Coagulation Function | √ | √ | √ |  |
| Biochemistry, β2-MG, CRP, pro-BNP | √ | √ | √ |  |
| Thyroid Function, Amylase, Lipase | √ |  | √ |  |
| Electrocardiogram, Cardiac Ultrasound | √ |  | √ |  |
| Viral Serology Tests | √ |  | √ |  |
| Imaging Studies | √ |  | √ |  |
| EORTC QLQ-C30 Quality of Life Questionnaire | √ |  | √ |  |
| Concomitant Diseases & Related Treatments | √ | √ | √ |  |
| Adverse Events |  | √ | √ |  |

**6.2 Study endpoints**

Primary endpoints: 2-year PFS rate;

Secondary endpoints: 2-year OS rate, CR rate, the time of hematopoietic reconstruction, and AEs.

1. **Efficacy evaluation**
   1. **Evaluation criteria**

PET-CT will be performed according to the revised criteria for evaluation of the efficacy of malignant lymphoma in 2007. The assessment of response includes CR, PR, stable (SD), disease recurrence (post-CR), or disease progression (post-PR, post-SD). See Appendix 1-3 for details.

The response of those who underwent enhanced CT scans will be evaluated according to the criteria for the efficacy assessment criteria for adult indolent and progressive NHL established by U.S. and international lymphoma experts in 1999, The assessment of response includes CR, unconfirmed CR (CRu), PR, SD, post-CR, or post-PR, post-SD.

**7.2 Evaluation methods**

Evaluation of the tumor before and after treatment, including physical examination, CT/MRI, while PET-CT is recommended.

1. **Adverse event**

**8.1 Definition**

An adverse event (AE) is any undesired medical event related to or unrelated to treatment that occurs in the clinical trial after treatment. It can be any adverse and unexpected signs, symptoms, laboratory examinations, and other abnormal results, whether or not they are treatment-related. The severity of AEs is graded according to the grading method recommended by the NCI CTC (4th Edition) Common Toxicity Criteria Grading system. All AEs should be recorded in the CRF table. AEs (such as blindness, neurotoxicity, loss of limbs, etc.) that are not resolved during the clinically possible observation period are classified as permanently unresolved, and the time for resolution of the event is left blank in the CRF table.

**8.2 Attribution of the AE**

The investigator should evaluate the possible association between AEs and the investigational drug and the combination drug with reference to the following 5-level classification criteria:

Definitely related - The AE is clearly related to the study treatment. The reaction occurs in accordance with the reasonable time sequence after administration, and the reaction is consistent with the known safety events of the study drug. The reaction is improved after drug withdrawal and reappears after repeated administration.

Probable related- The AE is likely related to the study treatment. The reaction occurs in accordance with the reasonable time sequence after administration, and the reaction is consistent with the known safety events of the study drug. The patient's clinical status or other treatment modalities may also cause this event.

Possible unrelated- The AE may not be related to the study treatment. Reactions appear to be less consistent with a reasonable time sequence after administration, and reactions are less consistent with the known type of reaction of the study drug. The patient's clinical status or other treatment modalities may also cause this event.

Unrelated - The AE is unrelated to the study treatment. The reactions do not conform to the reasonable time sequence after administration, and the reactions are consistent with the known reaction types of other drugs. The patient's clinical status or other treatment modalities may produce the response, the disease status improves or discontinuation of the drug (other than the study drug) results in improvement of safety events, and the safety events reappear with reuse of the suspected drug.

Unknown-The occurrence of the reaction is not clearly related to the time sequence after the administration of the study drug, and is similar to the type of reaction known for the study drug, and other drugs used at the same time may cause the same reaction.

Items 1), 2) and 5) above are recorded as treatment-related AEs in this study. Incidence of adverse reactions=Number of adverse reactions/total number of patients×100%.

**8.3 Serious AE**

A serious adverse event (SAE) is defined as an undesired AE that occurs at any drug dose and meets one of the following criteria: 1) Results in death, 2) Life-threatening caused by the experimental drug, 3) Lead to hospitalization or prolonged hospitalization, 4) Permanent or significant loss of function/disability, 5) Teratogenic or carcinogenic.

Some events that require hospitalization or prolonged hospitalization may not be reported as serious AEs, including: 1) Hospitalization for social reasons other than AEs, 2) Hospitalization for elective surgery, tests, or other treatments scheduled before entering the study, 3) Progression of lymphoma and related events.

**8.4 Reporting process**

**8.4.1 All AEs**

All AEs during the trial should be reported. Serious adverse events are reported using the SAE Report form.

**8.4.2 SAEs**

When a SAE occurs (drug-related or unrelated), the investigator should report it within 24 hours.

1. **Data management and statistical analysis**

In order to ensure the safety of subjects and the accuracy, integrity and reliability of data during the whole process of the study, the researchers keep laboratory examination reports, clinical records and medical records in the patient files as the original documents of the clinical trial. If necessary, the authors allow direct access to the original documents by the sponsor, the relevant regulatory authorities, and the appropriate Ethical Review Board (ERB).

**9.1 Evaluation of curative effect**

**9.1.1 Primary endpoint**

The primary endpoint was 2-year PFS rate, defined as the proportion of patients who were alive and free from disease progression at 2 years after randomization.

**9.1.2 Secondary endpoints**

The secondary endpoint was 2-year OS rate, defined as the proportion of patients who were alive at 2 years after randomization.

PFS applies to all patients. PFS is calculated as the time from randomization to lymphoma progression or death for any cause, whichever occurred first. Patients without events were censored at the last disease assessment.

OS applies to all patients. OS is calculated as the time from randomization to death for any cause. Patients without events were censored at the last disease assessment.

PFS and OS are analyzed using the Kaplan-Meier method, and the median time and 95% confidence interval are calculated.

The other secondary endpoints included CR rate (the percentage of participants with complete response was determined using the 2014 Lugano criteria), the time of hematopoietic reconstruction, and transplantation-related adverse events (AEs). The first day of neutrophil counts ≥0.5 × 109/L for 3 consecutive days was the time of successful implantation of granulocytes. The first day of platelet counts ≥20.0 × 109/L for 7 consecutive days without platelet infusion was considered the successful megakaryocyte implantation time.

**9.2 Safety evaluation**

Safety evaluations include adverse effects observed during clinical trials and changes in laboratory data before and after treatment.

**9.3** **Statistical analysis**

**9.3.1** Statistical descriptions of pre-treatment data will be performed. For the comparison between two groups, the chi-square test, Fisher’s exact test, t-test or non-parametric test will be used as appropriate.

**9.3.2** Statistical description of the efficacy evaluation will be performed. The response rate of the two groups is compared using the chi-square test or Fisher’s exact test. The comparison of survival time between the two groups is performed using the Kaplan-Meier curve and Log-rank test. The COX regression model is used to compare the primary endpoint between the two groups.

**9.3.3** AEs will be described using statistical analysis. The chi-square test or Fisher's exact test is used to compare the incidence of AEs between two groups. If necessary, the mean values of laboratory data will be compared before and after treatment.

**9.3.4** Statistical analysis will be conducted using either SPSS (version 13.0), GraphPad (Prism version 9.1.1), or R (version 4.4.2). All statistical tests are conducted using a two-sided test. p value less than 0·05 will be considered statistically significant for the difference being tested. Determine the statistical analysis plan before data locking, and conduct statistical analysis according to the statistical analysis plan.

**9.3.5** Sample size calculation

For TCL patients (excluding ALK+ anaplastic large cell lymphoma with IPI 0-1) who achieved CR/PR after first-line treatment, literature reports (J Clin Oncol. 2012 Sep;30(25):3093-9.) indicate a 2-year PFS rate of 52.9%. It is expected that the 2-year PFS rate with Chi+BEAM conditioning will increase to 81%; setting α=0.05 (two-sided), power=0.9, and assuming a trial dropout rate of 8%, calculation using PASS software estimates that 23 patients are needed for the study.

**10. Trial quality control and data safety monitoring committee**

**10.1 Trial quality control**

To ensure that this study is carried out in strict accordance with the clinical trial protocol, clinical investigators, sponsors, and clinical monitors should operate in strict accordance with the requirements of GCP during the whole process of this study. It is necessary to ensure that the test procedures are standardized, the test data are accurate and the study conclusions are reliable. All medical records can be confirmed as valid only after the final data is verified and qualified.

**10.2 Data safety monitoring committee**

Zhi Peng, Beijing Cancer Hospital (Chair)

Ying Chen, Shanghai Zhongshan Hospital

Hengye Huang, Shanghai Jiaotong University School of Medicine

**11. Ethics principles**

**11.1 Researcher's responsibility**

It is the responsibility of the investigator to ensure that the clinical trial strictly complies with the requirements of the trial protocol, Chinese Good Clinical Practice (GCP) guidelines, and relevant regulations.

**11.2 Ethics Committee**

The investigator should provide copies of the following documents to the Ethics Committee before the trial begins:

The latest version of the clinical trial protocol and CRF；

Sample of informed consent form；

Investigator's brochure；

Investigator biography；

Other documents required by the Ethics Committee.

This trial may only be initiated with the written approval of the Ethics Committee. At the end of the trial, the investigator shall notify the Ethics Committee of the completion of the trial.

**11.3 Practice for Clinical Research Management**

This clinical trial will be conducted in accordance with the Declaration of Helsinki and the Chinese GCP guidelines. This study protocol must be approved by the single Ethics Committee responsible for clinical research before implementation. The investigator will ensure that this clinical study is conducted in accordance with the laws, regulations, scientific and ethical standards of the People's Republic of China regarding medical research. If it is found that the research plan needs to be revised during the research process, the revised research plan shall be submitted to the Ethics committee of the responsible unit for record/approval before implementation. If important new information related to the investigational drug is found, the informed consent form must be revised in writing and sent to the ethics committee of the responsible unit for approval, and the subject's consent must be obtained again.

**11.4 Informed consent**

Before participants are enrolled in the trial, the investigator must explain the purpose, method, possible benefits, potential risks, and possible discomfort. Participants are informed that participation in the trial is voluntary, that they can withdraw at any time, and that participation will have no impact on the treatment of their disease. Subjects' privacy will be protected.

The subject or custodian should have sufficient time to read the informed consent form and ask questions. Prior to enrollment, subjects or their guardians must sign informed consent forms, copies of which are kept by subjects.

**11.5** **Confidentiality of subject's personal data**

In this clinical trial, only the information required for the study was collected, such as the effectiveness and safety. The collection and use of such data will comply with relevant laws and regulations for the protection of the right to privacy.

**12. Data preservation**

All information contained in this clinical trial is only available for review by researchers, co-investigators, ethics committees, and supervisory authorities. Without the written approval of the sponsor, it is strictly prohibited to disclose any information to third parties not related to the study, except for the necessary explanations when signing informed consent forms with subjects who may participate in the study.

**13. Study evidence**

This study was conducted with reference to GCP and Chinese Guidelines for Diagnosis and Treatment of TCL.

**14. Responsibilities and publication requirements**

All research results and the right to use the results of the project are led by the sponsor and the principal investigator and are used jointly by all participating units in order of contribution degree.

15. Expected progress

Recruitment starting date: July 2022,

Program recruitment end date: June 2023,

23 young high-risk DLBCL patients are planned to be enrolled.

**References**

1. Broccoli A, Zinzani PL. Peripheral T-cell lymphoma, not otherwise specified. Blood. 2017;129:1103-12.

2. Du J, Yu D, Han X, Zhu L, Huang Z. Comparison of Allogeneic Stem Cell Transplant and Autologous Stem Cell Transplant in Refractory or Relapsed Peripheral T-Cell Lymphoma: A Systematic Review and Meta-analysis. JAMA Netw Open. 2021;4:e219807.

3. Zhang Q, Wang S, Chen J, Yu Z. Histone Deacetylases (HDACs) Guided Novel Therapies for T-cell lymphomas. Int J Med Sci. 2019;16:424-42.

4. Xu Y, Zhang P, Liu Y. Chidamide tablets: HDAC inhibition to treat lymphoma. Drugs Today (Barc). 2017;53:167-76.

5. Ning ZQ, Li ZB, Newman MJ, Shan S, Wang XH, Pan DS, et al. Chidamide (CS055/HBI-8000): a new histone deacetylase inhibitor of the benzamide class with antitumor activity and the ability to enhance immune cell-mediated tumor cell cytotoxicity. Cancer Chemother Pharmacol. 2012;69:901-9.

6. Zhou J, Zhang C, Sui X, Cao S, Tang F, Sun S, et al. Histone deacetylase inhibitor chidamide induces growth inhibition and apoptosis in NK/T lymphoma cells through ATM-Chk2-p53-p21 signalling pathway. Invest New Drugs. 2018;36:571-80.

7. Shi Y, Jia B, Xu W, Li W, Liu T, Liu P, et al. Chidamide in relapsed or refractory peripheral T cell lymphoma: a multicenter real-world study in China. J Hematol Oncol. 2017;10:69.

8. Xia Y, Wang L, Ding K, Wu J, Yin H, Hu M, et al. Chidamide-BEAC plus autologous stem cell transplantation in high-risk non-Hodgkin lymphoma: a phase II clinical trial. Chin Med J (Engl). 2023;136:1491-3.

Appendix 1: Evaluation Criteria for Malignant Lymphoma (Lugano Criteria)

| Response | Position | PET-CT (metabolic reaction) | CT (morphological response) |
| --- | --- | --- | --- |
| Complete remission | Extranodal position and nodules | 5-PS score 1-3, regardless of whether there is a lump residue | (1) LDi of target lesion (lymph node mass) was reduced to less than 1.5 cm, (2) No extralymphatic lesions |
| Unmeasured lesion | - | None |
| Organ enlargement | - | Reduce to normal |
| New lesion | None | None |
| Bone marrow | No evidence of FDG uptake | Normal morphology (If the morphology is uncertain, flow cytometry is negative.) |
| Partial remission | Extranodal position and nodules | 1. 5-PS score of 4-5, and decreased uptake compared with baseline, (2) No new or progressive lesions, (3) These findings suggest that treatment is effective at the interim assessment and that residual disease remains at the end-of-treatment assessment. | All conditions were met: (1) SPD decreased by more than 50% in at least 6 measurable lesions, (2) If the lesion is too small to be measured by CT, it should be treated by 5mm×5mm, (3) When not visible, according to 0mm×0mm processing, (4) When the lesion is larger than 5mm×5mm, but smaller than the normal value, the actual measured value is treated |
| Unmeasured lesion | - | None or normal or reduced, no increase |
| Organ enlargement | - | The portion of the spleen that exceeds its normal size has shrunk by at least 50%. |
| New lesion | None | None |
| Bone marrow | Uptake is higher than normal bone marrow but lower than baseline, and diffuse uptake may be increased due to reactive hyperplasia after chemotherapy, If focal uptake changes persist even after treatment for lymphadenopathy, further biopsy or periodic scanning may be considered. | - |
| Stable disease | Target lymph node (lymph node mass), extranodal lesion | 1. 5-PS score of 4-5, no significant difference from baseline, (2) No new or progressive lesions. | 1. Up to 6 measurable major lymph nodes or extranodal lesions had SPD reductions of less than 50% from baseline, (2) Did not meet the PD standard. |
| Unmeasured lesion | - | Does not meet PD standards |
| Organ enlargement | - | Does not meet PD standards |
| New lesion | None | None |
| Bone marrow | No change from baseline | - |
| Progressive disease | Target lymph node (lymph node mass), extranodal lesion | (1) A 5-PS score of 4-5, a significant increase from baseline uptake, and/or (2) Mid-term or post-treatment examination reveals new FDG uptake lesions consistent with lymphoma changes. | At least 1: (1) PPD progress, (2) Individual lymph nodes/lesions abnormal, (3) LDi >1·5cm and PPD increased 50% from the lowest point and LDi or SDi increased 0·5cm(for <2cm lesions) or 1cm(for >2cm lesions) from the lowest point, (4) Splenomegaly: If the original spleen is large, the degree of splenomegaly exceeds the original 50%. If there is no splenomegaly, the splenomegaly is at least 2cm above baseline. (5) New or re-emerging splenomegaly. |
| Unmeasured lesion | None | New, unmeasured lesions or significant progression of preexisting lesions |
| New lesion | (1) New FDG uptake lesions that cannot be explained by other causes (such as infection, inflammation, etc.), (2) If the cause cannot be determined, biopsy or regular follow-up scans should be considered. | (1) Regrowth of previously remitted lesions, (2) Newly added lymph nodes with any diameter >1·5cm, (3) New extranodal lesions with any diameter >1·0cm, If <1·0cm, it needs to be clearly present and attributed to lymphoma, (4) Evaluable lesions of any size that can be directly attributed to lymphoma. |
| New lesion | New or recurrent FDG uptake lesions | New or recurrent bone marrow involvement |

**Appendix 2: NHL efficacy criteria (excluding PET-CT)**

| **Curative effect** | **Physical examination** | **Lymph gland** | **Nodal mass** | **Bone marrow** |
| --- | --- | --- | --- | --- |
| **CR** | Normal | Normal | Normal | Normal |
| **CRU** | Normal | Normal | Normal | Uncertain |
| Normal | Normal | Reduce >75% | Normal or uncertain |
| **PR** | Normal | Normal | Normal | Positive |
| Normal | Reduce≧50% | Reduce≧50% | Irrelevant |
| Liver/spleen reduce | Reduce≧50% | Reduce≧50% | Irrelevant |
| **Relapse/PD** | Liver/spleen enlargement  New lesion | New lesions or enlargement | New lesions or enlargement | Recurrence |

**Appendix 3: NHL efficacy criteria (including PET-CT)**

| **Response** | **Definition** | **Nodular mass** | **Liver and spleen** | **Bone marrow** |
| --- | --- | --- | --- | --- |
| **CR** | All evidence of the lesions is disappeared. | a) High affinity for FDG or positive for PET before treatment, PET negative lymph nodes of any size,  b) FDG affinity is uncertain or PET is negative, and the lesion shrinks to normal size on CT. | Can't be touched. The nodules disappear. | Repeated biopsy results were negative. If morphology can't confirm the diagnosis we need a negative immunohistochemical result. |
| **PR** | Measurable reduction of lesions, no new lesions | SPD in the 6 largest lesions decreased by ≥50% the size of other nodules did not increase  a) High affinity for FDG or positive for PET before treatment, There were 1 or more PET-positive lesions at the original affected site,  b) Uncertain FDG affinity or negative PET, CT showed focal shrinkage. | Reduction of nodule SPD (or maximum transverse diameter of a single nodule) ≥50%, The liver and spleen are not enlarged. | If it is positive before treatment, it will not be used as a criterion for judging efficacy. The cell type should be clear. |
| **SD** | CR/PR or PD not achieved | a) High affinity for FDG or positive for PET before treatment, The original lesion was still positive for PET after treatment. CT or PET shows no new lesions,  b) Uncertain FDG affinity or negative PET, CT showed no change in the size of the original lesion. |  |  |
| **Relapse/PD** | Any newly added lesion or original lesion increased in diameter by ≥50% | Any new lesions with diameters >1·5 cm appear, Multiple lesions had SPD increases of ≥50% or single lesions with short diameter >1 cm before treatment had maximum diameter increases of ≥50%  The lesions with high affinity for FDG or positive for PET before treatment were positive for PET after treatment. | SPD increased by >50% in all lesions | New and reissued |

**Note: SPD/sum of the product of maximum vertical diameters **
