# Supplementary material
Source: Research Square preprint supplement (doi:10.21203/rs.3.rs-9258298/v1)
Supplement: Supplementary file 1 [file 2208377c2297ae71556fa447.xlsx]

## Sheet: Table 1
Table 1. Clinical characteristics of TCL patients
Characteristic	Overall (n=23) n (%)
Age, y
Median (range)	49 (22-65)
≤60	18 (78.3)
>60	5 (21.7)
Gender
Male	13 (56.5)
Female	10 (43.5)
PIT risk group
0	2 (8.7)
1	8 (34.8)
2	11 (47.8)
3-4	2 (8.7)
IPI risk group
0-2	13 (56.5)
3-5	10 (43.5)
ECOG
<2	19 (82.6)
≥2	4 (17.4)
Ann Arbor stage
I-II	1 (4.3)
III-IV	22 (95.7)
Extranodal sites
<2	18 (78.3)
≥2	5 (21.7)
LDH
≤normal	3 (13.0)
>normal	20 (87.0)
B symptom
without	12 (52.2)
with	11 (47.8)
First-line treatment regimen
CHOP/CHOP-like	14 (60.9)
CHOP plus etoposide	7 (30.4)
Others	2 (8.7)
pretransplant remission status
CR	17 (73.9)
PR	6 (26.1)
Number of CD34+ cells infused［106/kg，M (range)］	4.6 (2.2-15.2)
Abbreviations: PIT, prognostic index for PTCL-NOS; IPI, international prognostic index; ECOG, eastern cooperative oncology group; LDH, lactate dehydrogenase; CHOP, cyclophosphamide, doxorubicin, vincristine, and prednisone; CR, complete remission; PR, partial remission.

## Sheet: Table 2
	Table 2. Hematopoietic reconstitution of TCL patiens post ASCT
	Characteristic	Overall (n=23)
	Time to neutrophil engraftment［d，M (range)］	10 (8-15)
	Duration of Grade 4 agranulocytosis [d, M (range)]	8 (5-10)
	Duration of Grade 3 agranulocytosis [d, M (range)]	2 (1-5)
	Agranulocytosis with fever [cases (%)]	19 (82.6)
	Duration of agranulocytosis with fever [d, M (range)]	4 (1-6)
	Time to platelet engraftment［d，M (IQR)］	16 (11-25)
	Duration of Grade 4 athrombocytopenia [d, M (range)]	10 (7-16)
	Duration of Grade 3 athrombocytopenia [d, M (range)]	7 (3-12)
	Grade 4 anemia [cases (%)]	3 (13.0)
	Duration of Grade 4 anemia [d, M (range)]	5 (4-6)
	Red blood cell infusion within 1 month after transplantation [U, M (range)]	0.5 (0-2)
	Platelet infusion within 1 month after transplantation [U, M (range)]	4 (2-8)

## Sheet: Table 3
	Table 3. Transplantation-related adverse events
	Toxicities, n (%)		Grade
		1	2	3	4
	Infection	2 (8.7)	6 (26.1)	2 (8.7)	1 (4.3)
	Gastrointestinal	1 (4.3)	7 (30.4)	0 (0.0)	0 (0.0)
	Hepatic	0 (0.0)	5 (21.7)	2 (8.7)	0 (0.0)
	Cardiac	0 (0.0)	3 (13.0)	0 (0.0)	0 (0.0)
	Neurological	0 (0.0)	2 (8.7)	0 (0.0)	0 (0.0)
	Dermatological	1 (4.3)	5 (21.7)	0 (0.0)	0 (0.0)
	Vomiting	1 (4.3)	6 (26.1)	1 (4.3)	0 (0.0)
	Mucositis	1 (4.3)	5 (21.7)	1 (4.3)	0 (0.0)

## Sheet: Table 4
Table 4. Prospective studies on high-dose therapy and ASCT in PTCL as first-line therapy
Study	Year	Cases	PTCL subtypes	Response prior to ASCT	Conditioning regimen	Survival	Treatment related mortality
d’Amore, et al. (NLG-T-01)	2012	166	All subtypes excluding ALCL, ALK+	CR: 51% PR: 30%	BEAM; at Finnish centers, BEAC	PFS: 44% at 5 years OS: 51% at 5 years	0.04
Wilhelm, et al.	2016	111	All subtypes excluding ALCL, ALK+	CR: 62% PR: 20%	BEAM or Cy/TBI	PFS: 39% at 5 years OS: 44% at 5 years	0.036
Park et al. (COMPLETE)	2019	119	All subtypes excluding ALCL, ALK+	CR: 100%	mostly BEAM or different variations of BEAM	PFS: 68.8% at 2 years OS: 93.3% at 2 years	-
Meng-Meng Ji, et al.	2025	23	All subtypes excluding IPI 0-1 ALCL, ALK+	CR: 73.9% PR: 21.7%	Chi-BEAM	PFS: 95.7% at 2 years OS: 100.0% at 2 years	0

## Sheet: Table 5
Table 5. Autologous stem cell transplantation in retrospective studies.
Study	Year	Cases	PTCL subtypes	Response prior to ASCT	Conditioning regimen	Survival	Treatment related mortality
Fossard, et al. (LYSA centers)	2017	269	All subtypes excluding ALCL, ALK+	CR: 81% PR: 19%	BEAM	PFS: 45.0% at 5 years OS: 60.4% at 5 years	-
Garcia-Sancho, et al. (GELTAMO/FIL study)	2022	103	All subtypes excluding ALCL, ALK+	CR:100%	/	PFS: 63.0% at 5 years OS: 70.0% at 5 years	-
						t
